# Supplementary material for: One-pot synthesis of N-methylpyrrolidine (NMPD) using Cu- and Ni-modified ZSM-5 as an efficient catalyst
Source: Royal Society of Chemistry journal article supplement (doi:10.1039/c8gc02640h), 2018-11-22
Supplement: c8gc02640h1.pdf [file c8gc02640h1.pdf]

## Supplementary Information:

### One-pot synthesis of N-methylpyrrolidine (NMPD) using Cu- and Ni- modified ZSM-5 as an efficient catalyst

Long Yan,<sup>a,b</sup> Peixue Wang,<sup>a</sup> Fei Yuqing,<sup>a,b</sup> Zhou Dawei,<sup>a,b</sup> Liu Shimin,<sup>\*a</sup> and Deng Youquan<sup>\*a</sup>

#### General procedures for the preparation of 3%Cu-3%Ni/ZSM-5

The 3%Cu-3%Ni/ZSM-5 catalyst was prepared by incipient wetness method using  $\text{Cu}(\text{NO}_3)_2 \cdot 3\text{H}_2\text{O}$  and  $\text{Ni}(\text{NO}_3)_2 \cdot 6\text{H}_2\text{O}$  as starting materials. 1.14g  $\text{Cu}(\text{NO}_3)_2 \cdot 3\text{H}_2\text{O}$  (0.3g Cu) and 1.5g  $\text{Ni}(\text{NO}_3)_2 \cdot 6\text{H}_2\text{O}$  (0.3g Ni) dissolved in 3mL water, then 10g HZSM-5 was added zeolite with continuous stirring at room temperature. After 2h stirring and 2h aging, the resulted precipitate was dried at 110 °C for 12h. Then, the precursors were calcined at 500 °C for 3h in air. The calcined catalysts were denoted as 3%Cu-3%Ni/ZSM-5.

**Table S1** The contents of Cu and Ni measured by AAS

| catalyst            | Content wt% |      |
|---------------------|-------------|------|
|                     | Cu          | Ni   |
| 1.5%Cu-1.5%Ni/ZSM-5 | 1.43        | 1.47 |
| 3%Cu-3%Ni/ZSM-5     | 2.92        | 2.89 |
| 2%Cu-4%Ni/ZSM-5     | 2.36        | 3.93 |
| 3%Cu/ZSM-5          | 2.87        |      |
| 6%Ni/ZSM-5          |             | 5.52 |
| 3%Cu-3%Ni/ZSM-5*    | 2.14        | 2.59 |

\* after 5 cycles

**Table S2** BET analyses of different samples

| Sample                       | Specific surface area ( $\text{m}^2/\text{g}$ ) | Pore volume ( $\text{cm}^3/\text{g}$ ) | Average pore radius (nm) |
|------------------------------|-------------------------------------------------|----------------------------------------|--------------------------|
| HZSM-5                       | 388                                             | 0.355                                  | 2.459                    |
| 3%Cu-3%Ni/ZSM-5              | 285                                             | 0.249                                  | 2.348                    |
| 6%Cu-6Ni%/ZSM-5              | 260                                             | 0.205                                  | 2.252                    |
| 3%Cu-3%Ni/ZSM-5 <sup>a</sup> | 281                                             | 0.182                                  | 2.163                    |
| 3%Cu-3%Ni/ZSM-5 <sup>b</sup> | 299                                             | 0.276                                  | 2.215                    |

<sup>a</sup> the Si/Al ratio was 50; <sup>b</sup> the Si/Al ratio was 300

**Table S3** XPS peak table of 3%Cu-3%Ni/ZSM-5

| Name | Start BE | Peak BE | End BE | Atomic % |
|------|----------|---------|--------|----------|
| C1s  | 2980.8   | 284.8   | 279.28 | 93.33    |
| Cu2p | 970.08   | 932.98  | 925.28 | 3.13     |
| Ni2p | 890.08   | 855.8   | 845.28 | 3.54     |

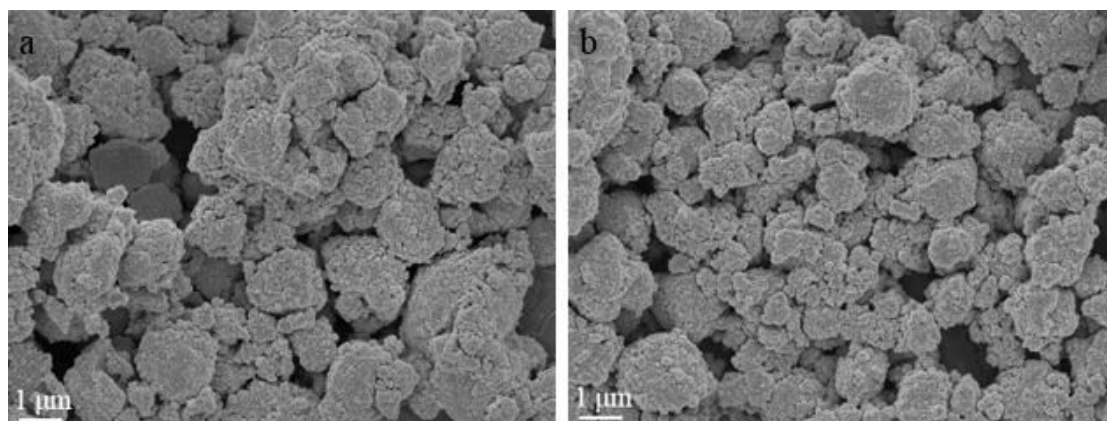

Fig. S1 SEM images of a) H-ZSM-5, b) 3%Cu-3%Ni/ZSM-5

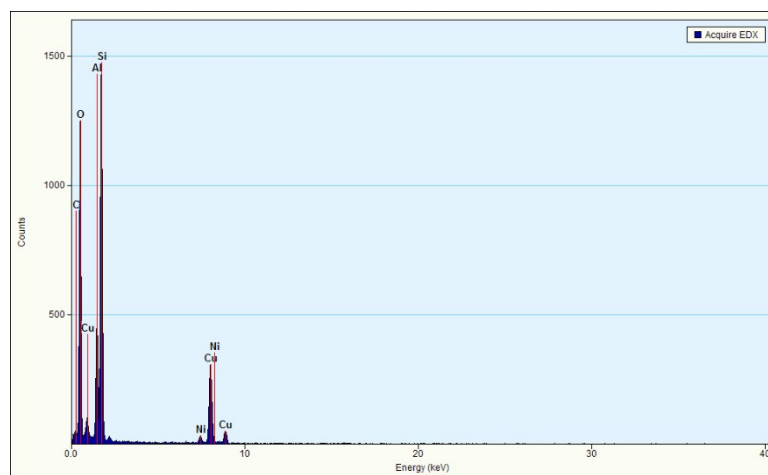

Fig. S2 the EDX pattern of 3%Cu-3%Ni/ZSM-5

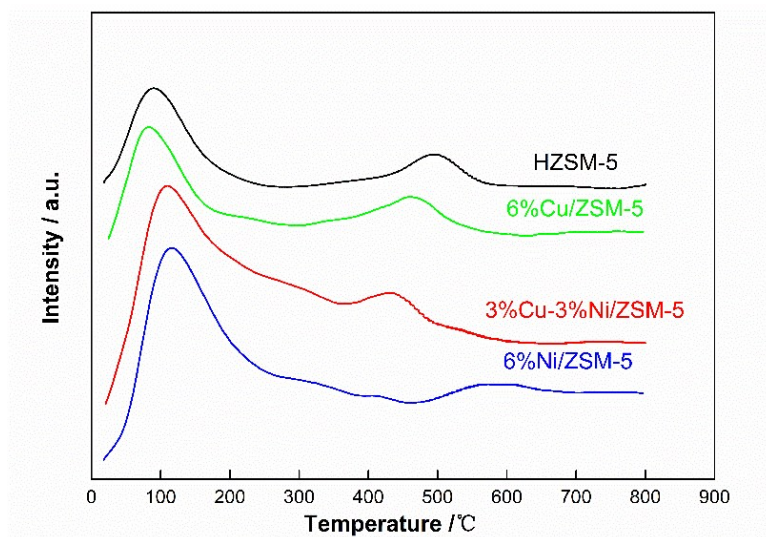

Fig. S3 The TPD curves of different catalysts
